# Supplementary material
Source: ML conference proceedings conference paper supplement (https://openreview.net/forum?id=eOdSD0B5TE)

Varying the dataset complexity

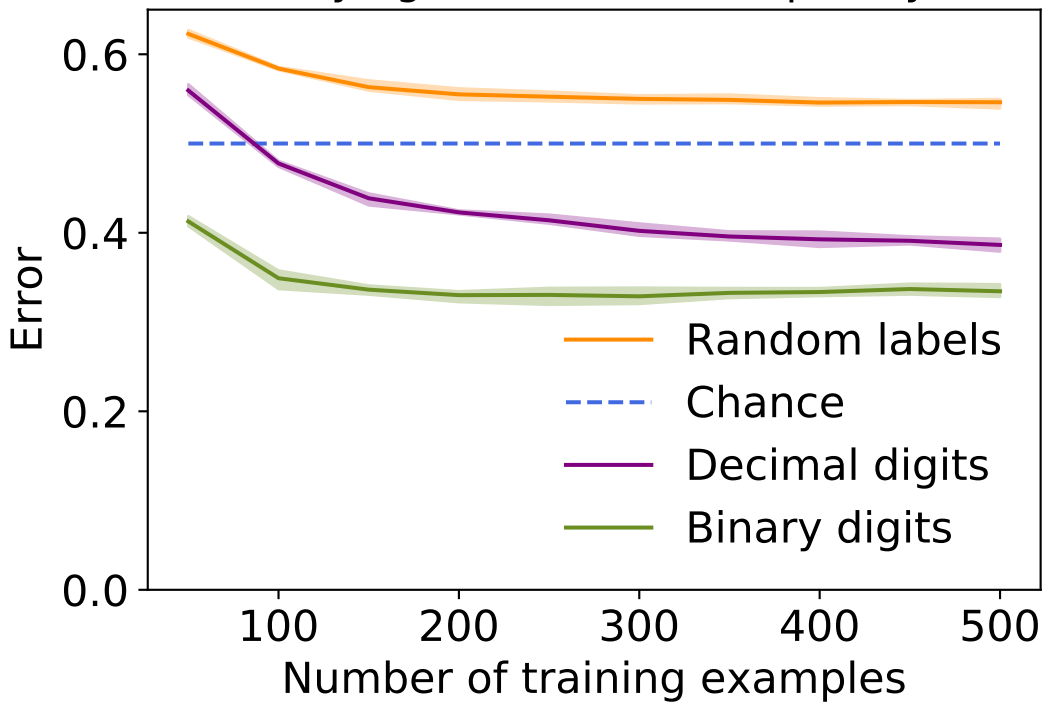

Supplement: supplementary_material [file attachment]

Varying the label scale at depth 7

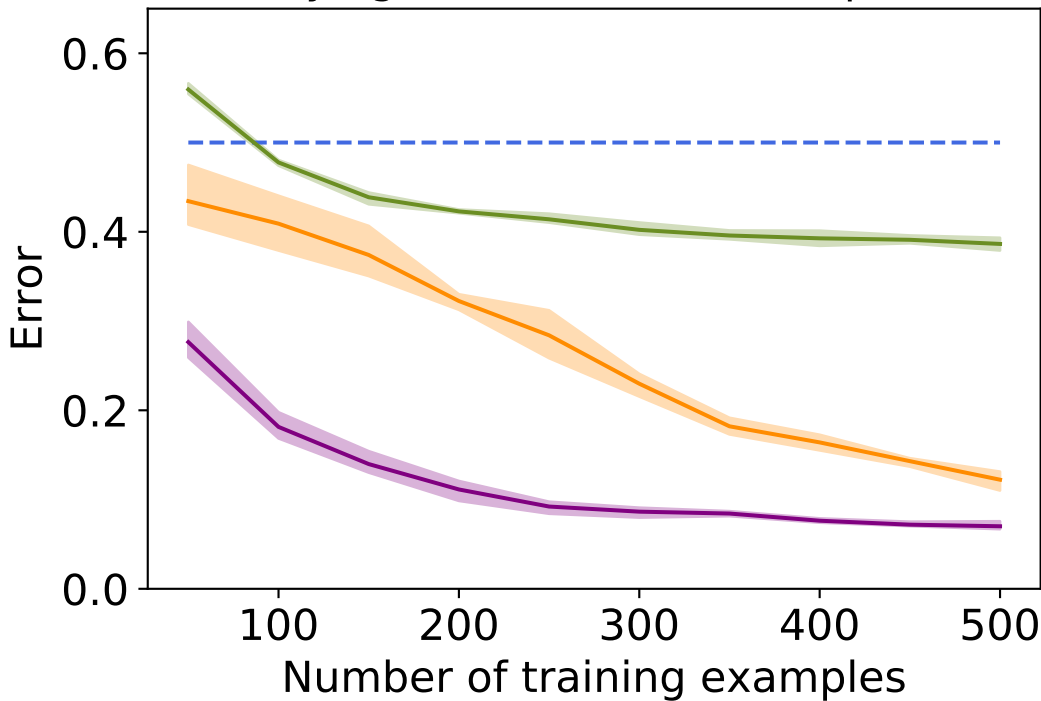

Supplement: supplementary_material [file attachment]

Holdout error along the label ray

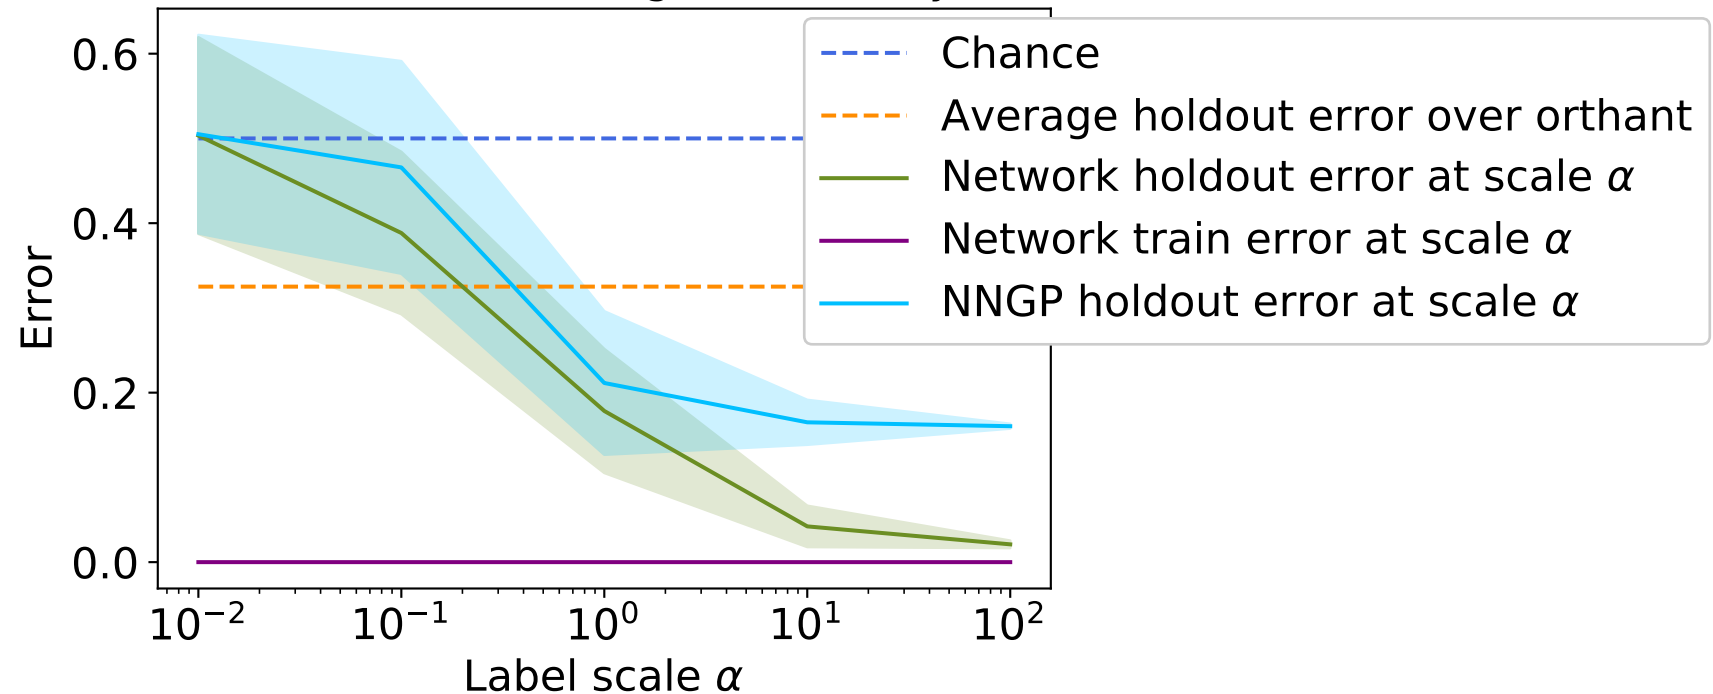

Supplement: supplementary_material [file attachment]

Varying the label scale at depth 2

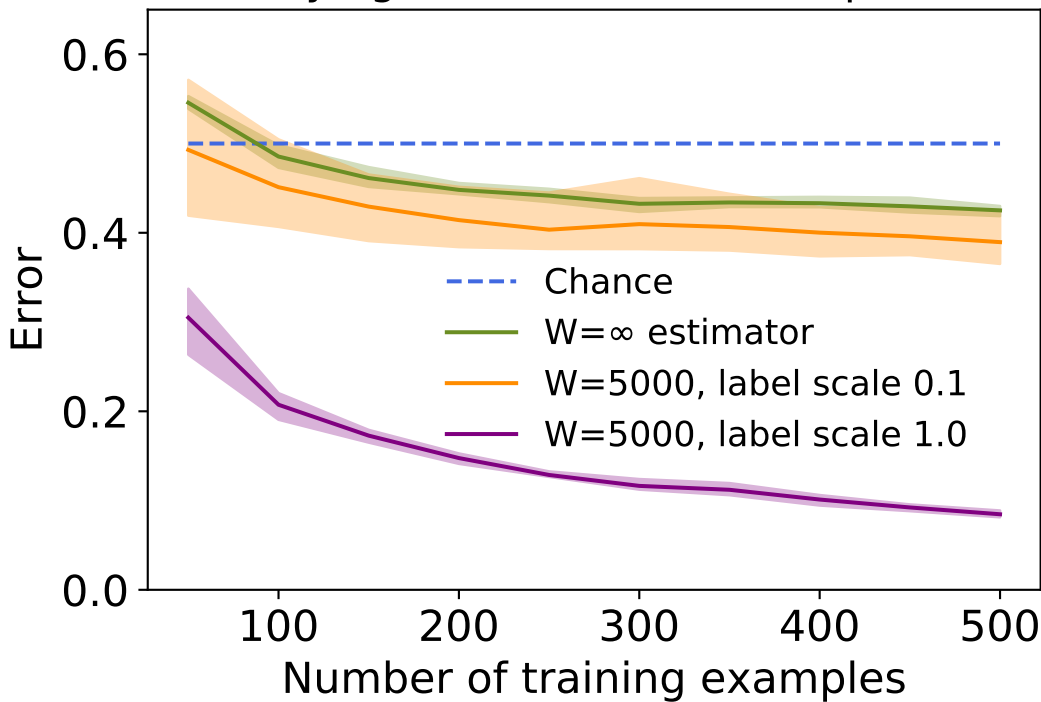

Supplement: supplementary_material [file attachment]

Varying the number of layers

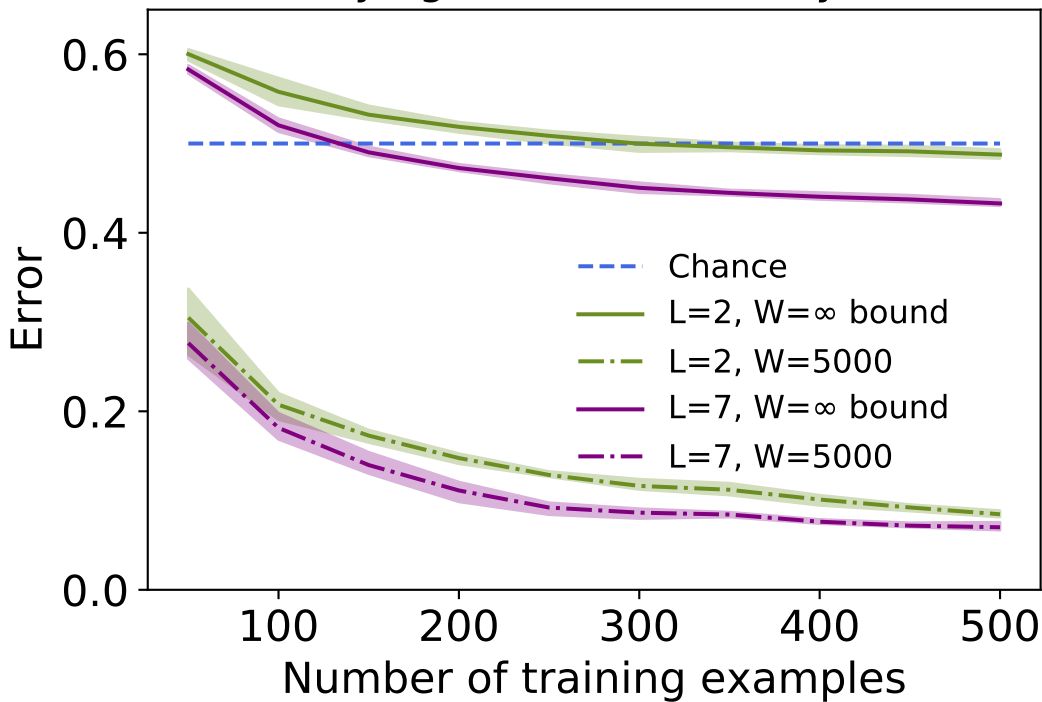

Supplement: supplementary_material [file attachment]

# Comparing to gradient descent

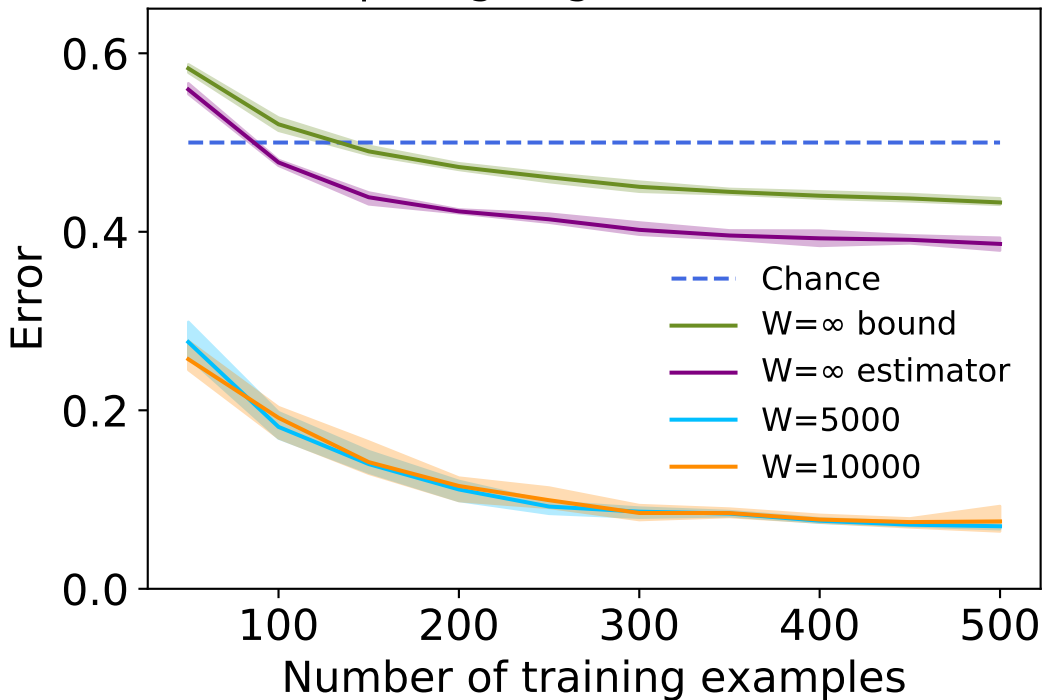

Supplement: supplementary_material [file attachment]
